# Supplementary material
Source: PubMed Central journal article supplement (PMC6416905)
Supplement: JB.00686-18-s0001.pdf [file JB.00686-18-s0001.pdf]

## Supplemental Information

### **RNase HIII is important for Okazaki fragment Processing in *Bacillus subtilis***

Justin R. Randall<sup>1</sup>, Taylor M. Nye<sup>2</sup>, Katherine J. Wozniak<sup>2</sup> and Lyle A. Simmons\*

Department of Molecular, Cellular, and Developmental Biology, University of Michigan, Ann Arbor, MI 48109

\*Corresponding author

LAS: Department of Molecular, Cellular, and Developmental Biology, University of Michigan, Ann Arbor, Michigan 48109-1055, United States. Phone: (734) 647-2016, Fax: (734) 615-6337  
E-mail: [lasimm@umich.edu](mailto:lasimm@umich.edu)

<sup>1</sup>Present address: Department of Molecular Biosciences, University of Texas at Austin.

<sup>2</sup>These authors contributed equally

Running title: Okazaki fragment maturation

**Table S1.** Identification of genome variants in  $\Delta rhnC$ ,  $rhB::erm$  resequencing

| Gene                          | Mutation           | Annotation              | Frequency | Description                        |
|-------------------------------|--------------------|-------------------------|-----------|------------------------------------|
| <i>rpoC</i>                   | A → C              | Q148P                   | 0.8       | RNA-polymerase B' subunit          |
| <i>gutB</i>                   | A <sub>5</sub> → 4 | Coding<br>(28/1134nt)   | 1         | Sorbitol dehydrogenase             |
| <i>coaA</i>                   | G → T              | A70D                    | 1         | Pantothenate kinase                |
| <i>rhnC</i> → / ← <i>pheT</i> | Δ1 bp              | Intergenic<br>(+10/+26) | 1         | Intergenic                         |
| <i>yeaD</i>                   | T → C              | S194S                   | 1         | Unknown                            |
| <i>yqxC</i>                   | T → G              | N135T                   | 0.2       | Putative rRNA<br>methyltransferase |
| <i>rsiX</i>                   | G → A              | T303T                   | 0.2       | Sigma factor X                     |

**Table S2.** List of strains

| Strain | Genotype                           | Citation  |
|--------|------------------------------------|-----------|
| JRR1   | <i>E. coli</i> BL21 <sub>DE3</sub> |           |
| JRR2   | <i>E. coli</i> MC1061              |           |
| JRR27  | PY79                               | (1)       |
| JRR48  | $\Delta rnhC$                      | (2)       |
| JRR25  | $\Delta rnhB$                      | (2)       |
| JRR33  | $\Delta rnhC rnhB::erm$            | This work |
| JWS235 | $\Delta polA$                      | This work |
| JRR64  | $\Delta rnhC \Delta polA$          | This work |
| JRR94  | $\Delta ypcP$                      | This work |
| JRR96  | $\Delta rnhC \Delta ypcP$          | This work |
| JWS236 | $\Delta rnhB \Delta polA$          | This work |



**Table S4.** List of plasmids

| Plasmid | Vector  | Insert            |
|---------|---------|-------------------|
| pDR244  | N/A     | N/A (BGSC)        |
| pJR22   | pE-SUMO | <i>polA</i> (3)   |
| pJR31   | pE-SUMO | <i>ypcP</i>       |
| pJR17   | pE-SUMO | <i>rnhB</i> (3)   |
| pJR19   | pE-SUMO | <i>rnhC</i> (3)   |
| pJR82   | pE-SUMO | <i>ypcP D192N</i> |

D192N

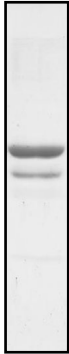

**Supplemental Figure S1. SDS-PAGE of purified YpcP D192N stained with Coomassie Brilliant Blue.**

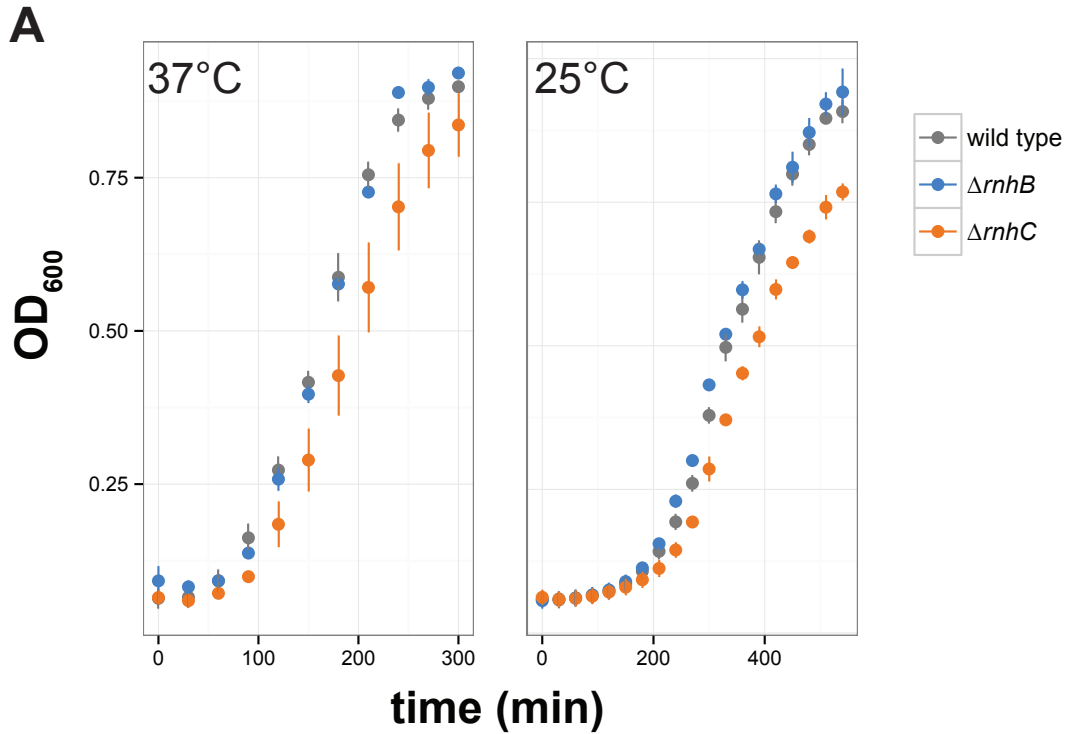

**B**

|      | Strain        | Growth rate ( $\mu_m$ ) | 95% CI      | Doubling time |
|------|---------------|-------------------------|-------------|---------------|
| 37°C | PY79          | 5.05                    | (4.41,5.68) | 137           |
|      | $\Delta rnhB$ | 5.14                    | (4.32,5.94) | 135           |
|      | $\Delta rnhC$ | 4.19                    | (3.49,4.88) | 165           |
| 25°C | PY79          | 2.86                    | (2.65,3.07) | 242           |
|      | $\Delta rnhB$ | 2.85                    | (2.66,3.03) | 243           |
|      | $\Delta rnhC$ | 2.24                    | (2.11,2.38) | 309           |

Growth rate estimates are multiplied by 1,000.

Growth rate estimate is the maximum  $OD_{600}/time$  over the linear portion of the model.

Doubling time estimates are given in minutes.

**Supplemental Figure S2. Cells with  $\Delta rnhC$  have a slow growth phenotype at 25°C.**

**(A)** Growth curves for wild-type and RNase H deficient strains at 37°C and 25°C. Three biological replicates were averaged at each time point and the standard error is represented by vertical bars. **(B)** Growth curves were fit to a modified Gompertz growth model (4). The estimated growth rate and 95% confidence intervals from the fit are indicated. Estimated doubling times were calculated as  $\ln(2)/\mu_m$  where  $\mu_m$  is the estimated growth rate obtained from the modified Gompertz growth model.

## REFERENCES

1. Youngman P, Perkins JB, Losick R. 1984. Construction of a cloning site near one end of Tn917 into which foreign DNA may be inserted without affecting transposition in *Bacillus subtilis* or expression of the transposon-borne *erm* gene. *Plasmid* 12:1-9.
2. Yao NY, Schroeder JW, Yurieva O, Simmons LA, O'Donnell ME. 2013. Cost of rNTP/dNTP pool imbalance at the replication fork. *Proceedings of the National Academy of Sciences of the United States of America* 110:12942-7.
3. Randall JR, Hirst WG, Simmons LA. 2017. Substrate specificity for bacterial RNase HII and HIII is influenced by metal availability. *J Bacteriol* doi:10.1128/JB.00401-17.
4. Zwietering MH, Jongenburger I, Rombouts FM, van 't Riet K. 1990. Modeling of the bacterial growth curve. *Appl Environ Microbiol* 56:1875-81.
